# Supplementary material
Source: PubMed Central journal article supplement (PMC4123212)
Supplement: NIHMS584402-supplement-01.pdf [file NIHMS584402-supplement-01.pdf]

SUPPLEMENTAL FIGURES

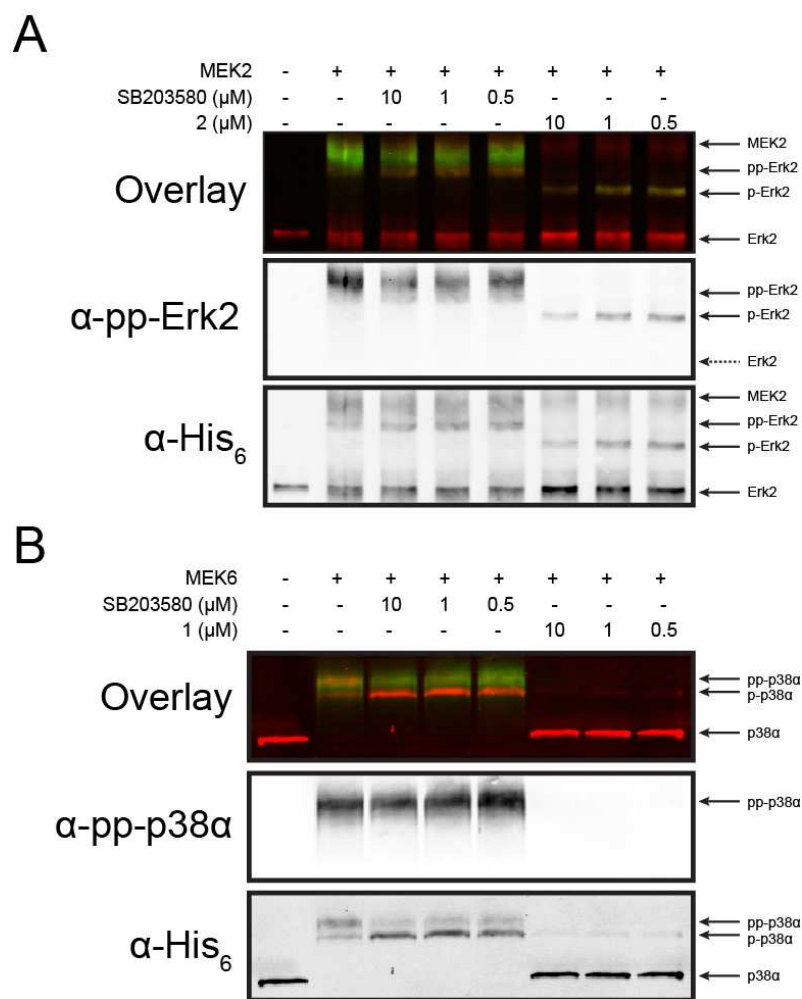

**Figure S1, related to Figure 3.** A. Activation inhibition analysis of Erk2<sup>DS1</sup> in the presence of inhibitor **2** or SB203580. The samples were run on a gel cast with PhosTag-acrylamide to separate phospho-isoforms, and the blot was probed with rabbit  $\alpha$ -pp-Erk2 (Santa Cruz Biotechnology) and mouse  $\alpha$ -His<sub>6</sub> (Abm). B. Activation inhibition analysis of p38 $\alpha$  in the presence of inhibitor **1** or SB203580. The samples were run on a gel cast with PhosTag-acrylamide to separate phospho-isoforms, and the blot was probed with rabbit  $\alpha$ -pp-p38 $\alpha$  (Cell Signaling) and mouse  $\alpha$ -His<sub>6</sub> (Abm).

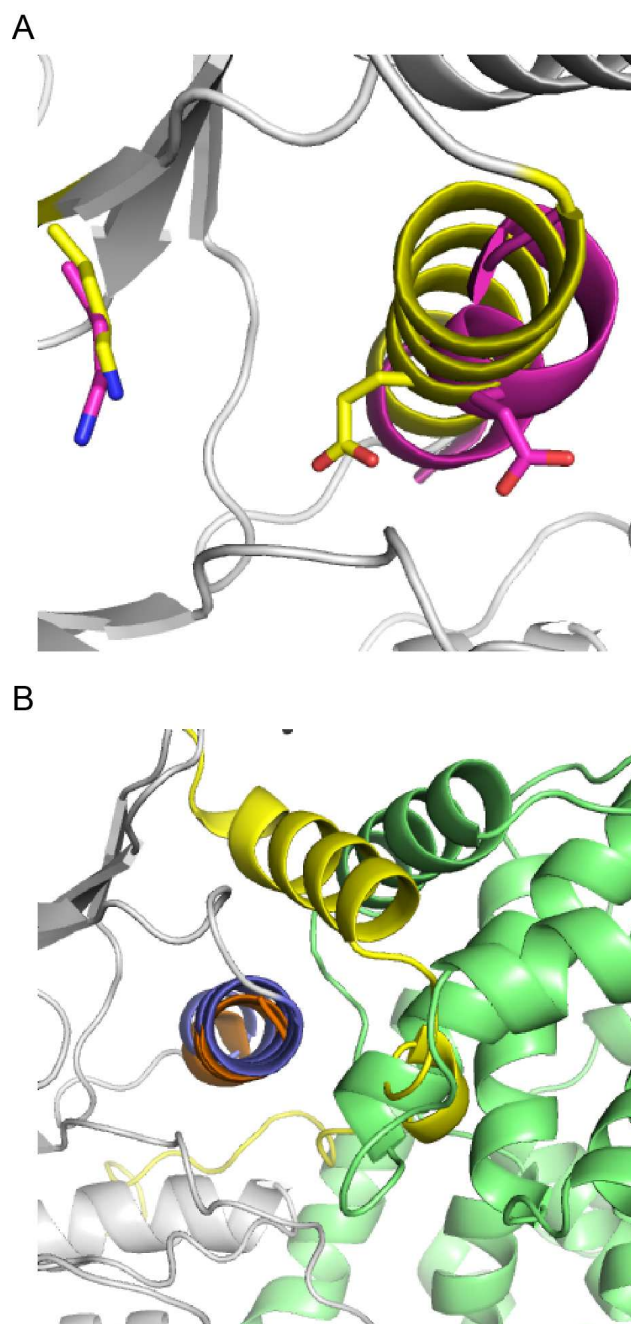

**Figure S2, related to Figure 5.** A. Superimposed structures of **3**-bound Erk2<sup>DS2</sup> (gray and yellow) and Src bound to an analogue of **3** (magenta) (PDB ID: 4DGG). The residues which form a salt bridge in the active conformation are represented in stick form. B. Superimposed structures of **3**-bound Erk2<sup>DS2</sup> (gray with helix  $\alpha$ C in blue and C-terminal extension in yellow) and cyclin-bound Cdk2 (helix  $\alpha$ C in orange and cyclin in green) (PDB ID: 1FIN).

A

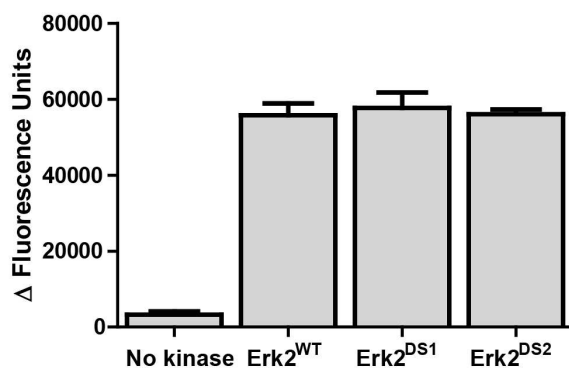

B

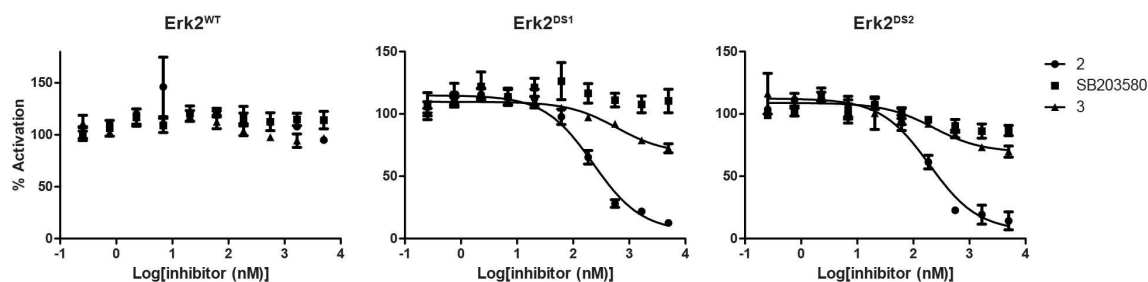

C

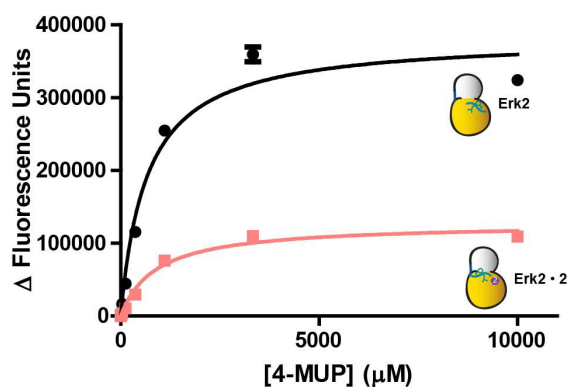

D

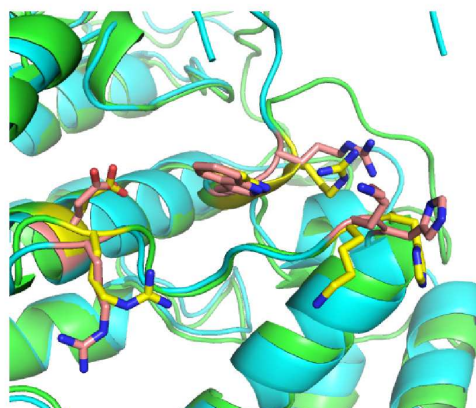

**Figure S3, related to Figure 7.** A. Increase in catalytic activity of DUSP6 upon addition of either Erk2 wild-type or inhibitor-sensitive mutants. The substrate used was 4-methylumbelliferyl phosphate (4-MUP). Background subtraction was performed using samples without kinase or DUSP6. B. Inhibition of Erk2-mediated DUSP6 activation. Ligands **2**, **3**, or SB203580 were titrated into unphosphorylated Erk2 wild-type or inhibitor-sensitive mutants. DUSP6 was then added to the reaction, followed by substrate 4-MUP. The phosphatase reaction was followed by fluorescence. The data were then fit to a curve, using zero inhibitor (DMSO) as the minimum possible level of inhibition and no Erk2 as the maximum. The  $EC_{50}$  values for ligand **2** were determined to be  $230 \pm 10$  nM and  $200 \pm 10$  nM for **2** against Erk2<sup>DS1</sup> and Erk2<sup>DS2</sup>,

respectively. Partial inhibition (~30%) was observed for ligand **3**. C. Kinetics of the DUSP6/Erk2<sup>DS1</sup> complex with different inhibitors.  $K_m$ [4-MUP] values were determined to be  $670 \pm 70 \mu\text{M}$  and  $890 \pm 100 \mu\text{M}$  for the apo and **2**-bound complexes, respectively. D. Structural alignment of Erk2 in the DFG-in (green, PDB ID: 1ERK) and DFG-out (cyan, PDB ID: 4I5H) conformations with residues forming the substrate binding domain shown as sticks in yellow and salmon, respectively. Error bars represent standard error of the mean (SEM) for three replicate measurements.

## SUPPLEMENTAL TABLES

A.

|                | <b>1</b>      | <b>2</b>    | <b>SB302580</b> |
|----------------|---------------|-------------|-----------------|
| $K_i$ (nM)     | $6.4 \pm 1.6$ | $< 2$       | $28 \pm 7$      |
| $EC_{50}$ (nM) | $7.4 \pm 0.9$ | $30 \pm 20$ | $>10000$        |

B.

|                     | <b>2</b>      |                | <b>SB203580</b> |                | <b>3</b>    |                |
|---------------------|---------------|----------------|-----------------|----------------|-------------|----------------|
|                     | $K_i$ (nM)    | $EC_{50}$ (nM) | $K_i$ (nM)      | $EC_{50}$ (nM) | $K_i$ (nM)  | $EC_{50}$ (nM) |
| Erk2 <sup>WT</sup>  | $>10000$      | $5000 \pm 800$ | $>10000$        | $>10000$       | $>10000$    | $390 \pm 40$   |
| Erk2 <sup>DS1</sup> | $4.7 \pm 0.3$ | $42 \pm 4$     | $9.8 \pm 1.1$   | $< 20^a$       | N/D         | N/D            |
| Erk2 <sup>DS2</sup> | $< 2$         | N/D            | $< 2$           | N/D            | $133 \pm 6$ | $840 \pm 30$   |

**Table S1, related to Figure 3.** A. Enzymatic inhibition ( $K_i$ ) and activation inhibition ( $EC_{50}$ ) of p38 $\alpha$  using the ligands shown in Figure 2B.  $K_i$  values for **1** and **2** were reported earlier.<sup>1</sup>  $EC_{50}$  values for **1** and SB203580 were determined by the present authors as a confirmation of data originally reported elsewhere.<sup>2</sup> B. Enzymatic inhibition ( $K_i$ ) and activation inhibition ( $EC_{50}$ ) of Erk2<sup>WT</sup>, Erk2<sup>DS1</sup>, and Erk2<sup>DS2</sup> by inhibitors **2**, **3**, and SB203580.  $K_i$  values for **2** were previously reported.<sup>1</sup> <sup>a</sup>Inhibition of only 30% at saturating inhibitor concentrations. As ligand **3** does not inhibit Erk2<sup>WT</sup> ( $K_i > 10,000$  nM), the  $EC_{50}$  value shown is due to direct inhibition of MEK2. Because inhibitor **3** more potently inhibits the phosphorylation of Erk2<sup>WT</sup>'s activation loop ( $EC_{50} = 390$  nM) compared to Erk2<sup>DS2</sup>'s activation loop ( $EC_{50} = 840$  nM), the observed inhibitory effect is most likely due to direct inhibition of MEK2 rather than through this inhibitor's interaction with the drug-sensitized Erk2 mutant. N/D: not determined.

### Data collection<sup>a</sup>

|                             |                                                                                                                                                        |
|-----------------------------|--------------------------------------------------------------------------------------------------------------------------------------------------------|
| Space group                 | P 1                                                                                                                                                    |
| Unit cell dimensions        | $a = 46.09 \text{ \AA}$ , $b = 57.63 \text{ \AA}$ , $c = 68.00 \text{ \AA}$<br>$\alpha = 86.57^\circ$ , $\beta = 88.98^\circ$ , $\gamma = 81.05^\circ$ |
| Wavelength ( $\text{\AA}$ ) | 0.97950                                                                                                                                                |
| Resolution ( $\text{\AA}$ ) | 67.88 – 2.20 (2.32 – 2.20)                                                                                                                             |
| Unique reflections          | 27949 (4179)                                                                                                                                           |
| $R_{pim}$                   | 0.099 (0.462)                                                                                                                                          |
| Mean $I/\sigma(I)$          | 4.2 (1.5)                                                                                                                                              |
| Completeness                | 79.8 (82.1)                                                                                                                                            |

|                                       |                                                                                                                                                                                                                                                                                                                                                                  |
|---------------------------------------|------------------------------------------------------------------------------------------------------------------------------------------------------------------------------------------------------------------------------------------------------------------------------------------------------------------------------------------------------------------|
| Multiplicity                          | 1.8 (1.8)                                                                                                                                                                                                                                                                                                                                                        |
| Wilson B-factor (Å <sup>2</sup> )     | 35                                                                                                                                                                                                                                                                                                                                                               |
| <b>Refinement</b>                     |                                                                                                                                                                                                                                                                                                                                                                  |
| Resolution (Å)                        | 2.20                                                                                                                                                                                                                                                                                                                                                             |
| Reflections (working set)             | 26534                                                                                                                                                                                                                                                                                                                                                            |
| Reflections (test set)                | 1399                                                                                                                                                                                                                                                                                                                                                             |
| R <sub>work</sub> / R <sub>free</sub> | 0.221 / 0.253                                                                                                                                                                                                                                                                                                                                                    |
| Protein atoms                         | 5512                                                                                                                                                                                                                                                                                                                                                             |
| Inhibitor atoms                       | 64                                                                                                                                                                                                                                                                                                                                                               |
| Water molecules                       | 83                                                                                                                                                                                                                                                                                                                                                               |
| Other atoms                           | 0                                                                                                                                                                                                                                                                                                                                                                |
| TLS groups                            | <b>A:</b> 8-13, 14-24, 25-34, 35-59, 60-74, 75-91, 92-97, 98-107, 108-158, 159-173, 174-187, 188-198, 199-205, 206-223, 224-274, 275-311, 312-328, 329-338, 339-346, 347-356<br><b>B:</b> 8-34, 35-59, 60-75, 76-92, 93-97, 98-116, 117-122, 123-168, 169-174, 187-198, 199-204, 205-215, 216-248, 249-261, 262-272, 273-285, 286-310, 311-328, 329-339, 340-356 |
| RMSD bond length (Å)                  | 0.006                                                                                                                                                                                                                                                                                                                                                            |
| RMSD bond angles (°)                  | 1.031                                                                                                                                                                                                                                                                                                                                                            |
| Ramachandran statistics               |                                                                                                                                                                                                                                                                                                                                                                  |
| In preferred regions                  | 94.6%                                                                                                                                                                                                                                                                                                                                                            |
| In allowed regions                    | 4.2%                                                                                                                                                                                                                                                                                                                                                             |
| Outliers                              | 1.2%                                                                                                                                                                                                                                                                                                                                                             |

<sup>a</sup>Values in parentheses are for highest resolution shell

**Table S2, related to Figure 5.** Data collection and structure refinement summary

|                     | EC <sub>50</sub> (nM) |            |               |                 |
|---------------------|-----------------------|------------|---------------|-----------------|
|                     | <b>1</b>              | <b>2</b>   | <b>3</b>      | <b>SB302580</b> |
| Erk2 <sup>WT</sup>  | N/D                   | >10000     | >10000        | >10000          |
| Erk2 <sup>DS2</sup> | N/D                   | < 20 (45%) | 72 ± 6 (-41%) | < 20 (-21%)     |
| p38α                | 25 ± 7 (76%)          | N/D        | N/D           | 190 ± 40 (-46%) |

**Table S3, related to Figure 6.** Phosphatase inhibition of Erk2 and p38α using the ligands shown in Figure 2B. Values in parentheses indicate average plateau levels. N/D: not determined.

## SUPPLEMENTAL METHODS

### Small molecule synthesis

**General procedures.** Kinases for *in vitro* experiments were expressed and purified as described.<sup>1</sup> SB203580 was purchased from LC Laboratories. Ligands **1**<sup>3</sup> and **2**<sup>1</sup> were made as described. All other reagents were purchased from commercial suppliers and used without further purification.

**Synthesis of ligand 3.** Unless otherwise noted, all reagents were obtained from commercial suppliers and used without further purification. NMR spectra were obtained on a Bruker AV-300 or -301 instrument at room temperature. Chemical shifts are reported in ppm and coupling constants in Hz. Mass spectra were obtained on a Bruker Esquire Ion Trap instrument.

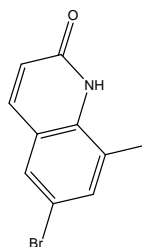

**6-bromo-8-methylquinolin-2(1H)-one** was made as described.<sup>4</sup>

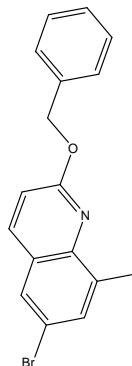

**2-(benzyloxy)-6-bromo-8-methylquinoline:** 6-bromo-8-methylquinolin-2(1H)-one (200 mg, 0.84 mmol), benzyl bromide (836 mg, 4.80 mmol), and Ag<sub>2</sub>CO<sub>3</sub> (323 mg, 1.17 mmol) dissolved in dichloromethane (5 mL) were stirred at room temperature for 2 d. The reaction was then filtered through a bed of celite-545 powder that was washed with ethyl acetate (10 mL). The crude reaction mixture was subjected to flash chromatography using an EtOAc/hexanes solvent gradient. <sup>1</sup>H NMR (300 MHz, CDCl<sub>3</sub>) δ 7.86 (d, *J* = 8.7 Hz, 1H), 7.70 (d, *J* = 2.1 Hz, 1H), 7.59 – 7.50 (m, 3H), 7.42 – 7.29 (m, 3H), 6.95 (d, *J* = 8.9 Hz, 1H), 5.55 (s, 2H), 2.68 (s, 3H); MS *m/z* (C<sub>17</sub>H<sub>14</sub>BrNO) calc'd = 327.0, observed: [M+H]<sup>+</sup> 328.4, 330.2 (Br doublet).

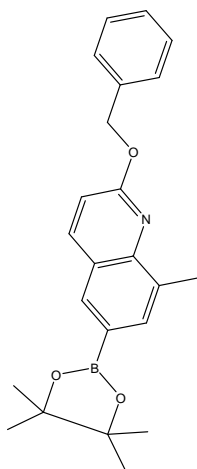

**[A] 2-(benzyloxy)-8-methyl-6-(4,4,5,5-tetramethyl-1,3,2-dioxaborolan-2-yl)quinoline:** This was made as described<sup>5</sup> (for the synthesis of “4c”) using 2-(benzyloxy)-6-bromo-8-methyl-1,2-dihydroquinoline (23 mg, 0.07 mmol) as the halide starting material. The product was further purified by flash chromatography (0 – 90% EtOAc:Hex). <sup>1</sup>H NMR (300 MHz, CDCl<sub>3</sub>)  $\delta$  8.09 (s, 1H), 7.98 (d, *J* = 8.9 Hz, 1H), 7.89 (s, 1H), 7.54 (d, *J* = 7.4 Hz, 2H), 7.46-7.24 (m, 3H), 6.92 (d, *J* = 8.7 Hz, 1H), 5.57 (s, 2H), 2.71 (s, 3H), 1.38 (s, 12H); MS *m/z* (C<sub>23</sub>H<sub>26</sub>BNO<sub>3</sub>) calc'd = 375.2, observed: [M+H]<sup>+</sup> 376.6 and [M+Na]<sup>+</sup> 398.5.

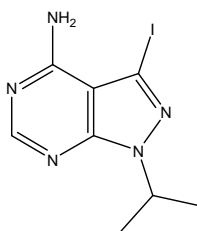

**[B] 3-iodo-1-isopropyl-1H-pyrazolo[3,4-d]pyrimidin-4-amine** was made as described.<sup>6</sup>

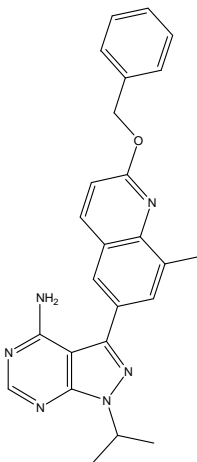

**[3] 3-(2-(benzyloxy)-8-methylquinolin-6-yl)-1-isopropyl-1H-pyrazolo[3,4-d]pyrimidin-4-amine:** This was made as described<sup>6</sup> (“General Suzuki coupling procedure” with RP-HPLC) using **A** (12 mg, 0.032 mmol) and **B** (9.7 mg, 0.032 mmol) as boronic ester and halide,

respectively, for a yield of 3.46 mg (25%).  $^1\text{H}$  NMR (300 MHz,  $\text{CDCl}_3$ )  $\delta$  8.24 (s, 1H), 8.05 (d,  $J = 8.8$  Hz, 1H), 7.83 (s, 1H), 7.75 (s, 1H), 7.56 (d,  $J = 7.2$  Hz, 2H), 7.47 – 7.32 (m, 3H), 7.07 (d,  $J = 8.8$  Hz, 1H), 6.31 (s, 1H), 5.61 (s, 2H), 5.29 – 5.12 (m, 1H), 2.80 (s, 3H), 1.66 (d,  $J = 6.8$  Hz, 6H); MS  $m/z$  ( $\text{C}_{25}\text{H}_{24}\text{N}_6\text{O}$ ) calc'd = 424.2, observed:  $[\text{M}+\text{H}]^+$  425.3.

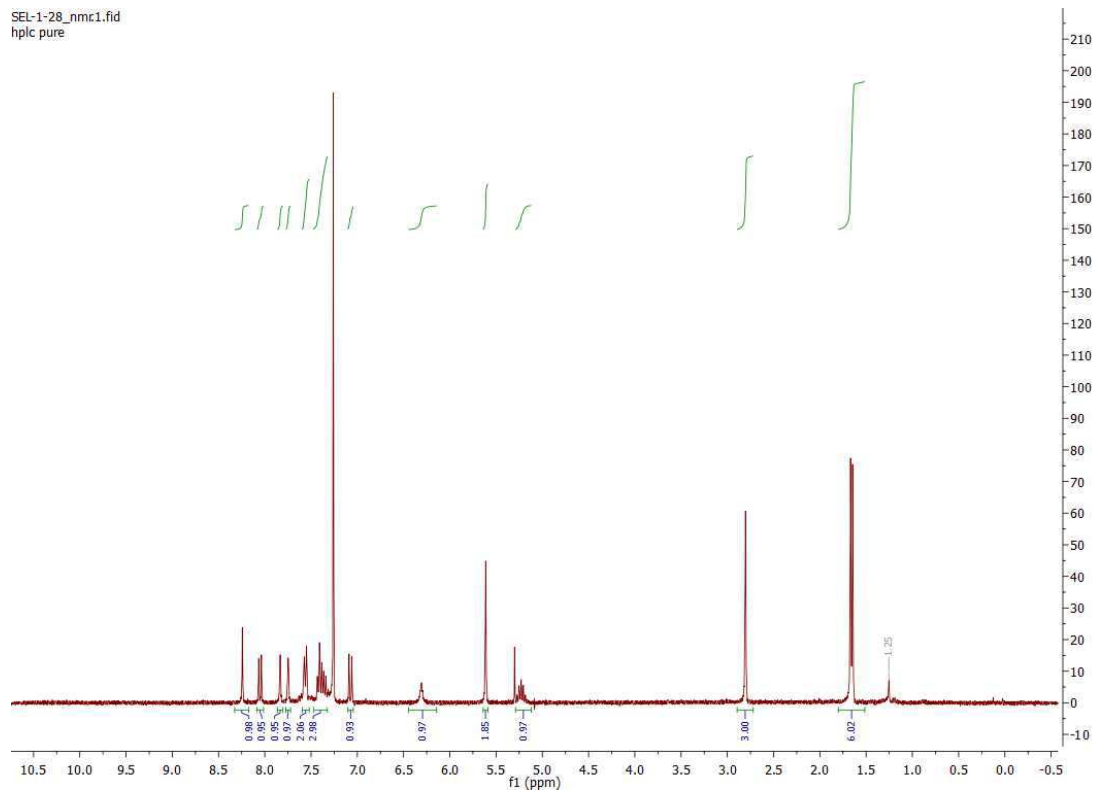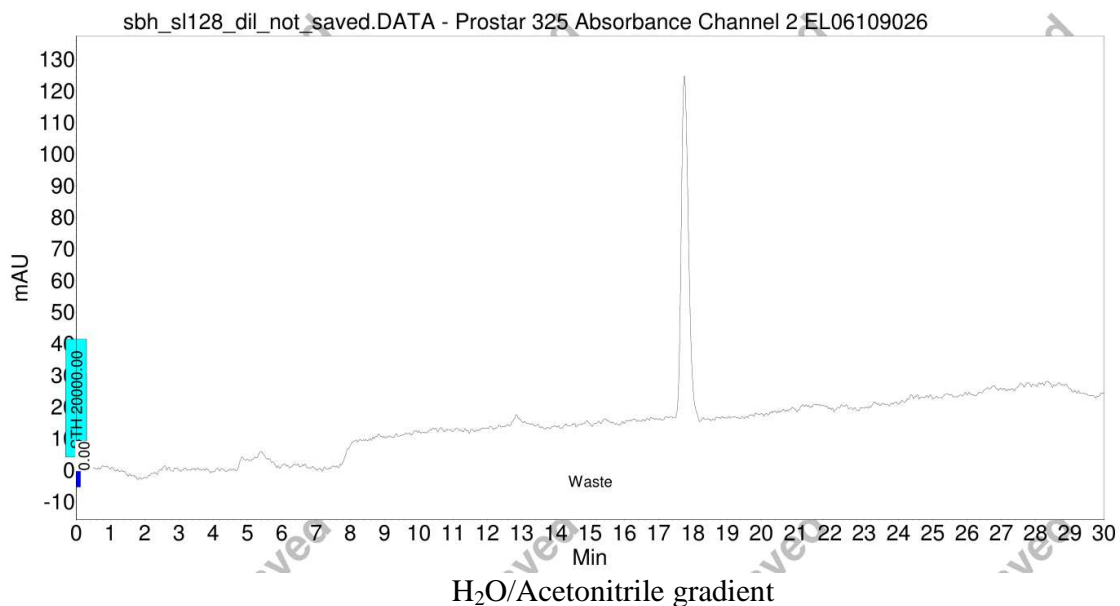



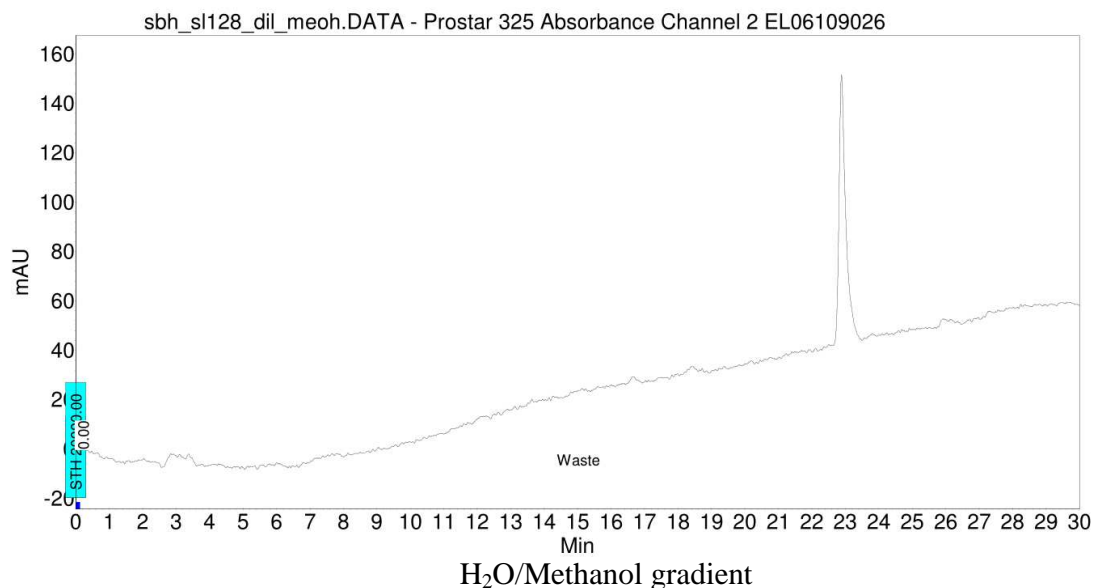

### Cloning and expression

**MAPKs and MEKs.** All MAPKs and MEKs used for *in vitro* assays were expressed and purified as described previously.<sup>1</sup>

**eGFP-tagged kinases.** The expression vector pcDNA-eGFP (#13031) was obtained through Addgene. A cassette containing an SspI site, linker, and ligation-independent cloning sites was inserted after the eGFP gene using site-directed mutagenesis.<sup>7</sup> An SspI site found elsewhere in the vector was removed by site-directed mutagenesis. The final vector was named pCEGFP-LIC. Genes coding Erk2<sup>WT</sup> and Erk2<sup>DS1</sup> were cloned into this vector using the ligation-independent cloning procedure described by Donnelly et al.<sup>8</sup>

**DUSP6.** Human DUSP6 (Addgene) was cloned into pMCSG7 (M. Donnelly) and expressed and purified with the same protocol used for kinases.<sup>1</sup>

**DUSP10.** Human DUSP10 (Open Biosystems) was cloned into pT7CFE1 and expressed using the 1-Step Human *In Vitro* Protein Expression Kit (Pierce) according to the manufacturer's instructions.

### Crystallography

Erk2<sup>DS2</sup> was prepared as described previously.<sup>1</sup> Kinase was incubated with inhibitor **3** (final 1 mM in 5% DMSO) for 30 min at room temperature and centrifuged before setting up crystallization trials. Sparse-matrix screens Wizard I-IV (Emerald Biosciences) were used to find a condition that yielded plate crystals (0.1 M CHES pH 9.5, 30% PEG 3000) in five days, and crystals were harvested directly from the sparse-matrix plate. Diffraction images were collected at SSRL beamline 12-2 and processed using Mosflm<sup>9</sup> and the CCP4 program suite.<sup>10</sup> The initial structural model was found by molecular replacement<sup>11</sup> using PDB entry 3QYW and then subjected to alternating rounds of automated and manual refinement using REFMAC5<sup>12</sup> and Coot,<sup>13</sup> respectively. The final structure was deposited in the Protein Data Bank under accession code 4N4S.

## SUPPLEMENTAL REFERENCES

1. Hari, S. B.; Merritt, E. A.; Maly, D. J., Sequence determinants of a specific inactive protein kinase conformation. *Chem. Biol.* **2013**, *20* (6), 806-15.
2. Sullivan, J. E.; Holdgate, G. A.; Campbell, D.; Timms, D.; Gerhardt, S.; Breed, J.; Breeze, A. L.; Bermingham, A.; Pauptit, R. A.; Norman, R. A.; Embrey, K. J.; Read, J.; VanScyoc, W. S.; Ward, W. H. J., Prevention of MKK6-Dependent Activation by Binding to p38 $\alpha$  MAP Kinase. *Biochemistry* **2005**, *44* (50), 16475-16490.
3. Dumas, J.; Hatoum-Mokdad, H.; Sibley, R.; Riedl, B.; Scott, W. J.; Monahan, M. K.; Lowinger, T. B.; Brennan, C.; Natero, R.; Turner, T.; Johnson, J. S.; Schoenleber, R.; Bhargava, A.; Wilhelm, S. M.; Housley, T. J.; Ranges, G. E.; Shrikhande, A., 1-Phenyl-5-pyrazolyl ureas: potent and selective p38 kinase inhibitors. *Bioorg. Med. Chem. Lett.* **2000**, *10* (18), 2051-2054.
4. Alabaster, C. T.; Bell, A. S.; Campbell, S. F.; Ellis, P.; Henderson, C. G.; Roberts, D. A.; Ruddock, K. S.; Samuels, G. M.; Stefaniak, M. H., 2(1H)-quinolinones with cardiac stimulant activity. 1. Synthesis and biological activities of (six-membered heteroaryl)-substituted derivatives. *J. Med. Chem.* **1988**, *31* (10), 2048-56.
5. DiMauro, E. F.; Newcomb, J.; Nunes, J. J.; Bemis, J. E.; Boucher, C.; Buchanan, J. L.; Buckner, W. H.; Cee, V. J.; Chai, L.; Deak, H. L.; Epstein, L. F.; Faust, T.; Gallant, P.; Geuns-Meyer, S. D.; Gore, A.; Gu, Y.; Henkle, B.; Hodous, B. L.; Hsieh, F.; Huang, X.; Kim, J. L.; Lee, J. H.; Martin, M. W.; Masse, C. E.; McGowan, D. C.; Metz, D.; Mohn, D.; Morgenstern, K. A.; Oliveira-dos-Santos, A.; Patel, V. F.; Powers, D.; Rose, P. E.; Schneider, S.; Tomlinson, S. A.; Tudor, Y. Y.; Turci, S. M.; Welcher, A. A.; White, R. D.; Zhao, H.; Zhu, L.; Zhu, X., Discovery of aminoquinazolines as potent, orally bioavailable inhibitors of Lck: synthesis, SAR, and in vivo anti-inflammatory activity. *J. Med. Chem.* **2006**, *49* (19), 5671-86.
6. Johnson, S. M.; Murphy, R. C.; Geiger, J. A.; DeRocher, A. E.; Zhang, Z.; Ojo, K. K.; Larson, E. T.; Perera, B. G.; Dale, E. J.; He, P.; Reid, M. C.; Fox, A. M.; Mueller, N. R.; Merritt, E. A.; Fan, E.; Parsons, M.; Van Voorhis, W. C.; Maly, D. J., Development of Toxoplasma gondii calcium-dependent protein kinase 1 (TgCDPK1) inhibitors with potent anti-toxoplasma activity. *J. Med. Chem.* **2012**, *55* (5), 2416-26.
7. Bryksin, A. V.; Matsumura, I., Overlap extension PCR cloning: a simple and reliable way to create recombinant plasmids. *BioTechniques* **2010**, *48* (6), 463-5.
8. Stols, L.; Gu, M.; Dieckman, L.; Raffin, R.; Collart, F. R.; Donnelly, M. I., A New Vector for High-Throughput, Ligation-Independent Cloning Encoding a Tobacco Etch Virus Protease Cleavage Site. *Protein Expres. Purif.* **2002**, *25* (1), 8-15.
9. Leslie, A. G. W., Recent changes to the MOSFLM package for processing film and image plate data. *Joint CCP4 + ESF-EAMCB Newsletter on Protein Crystallography* **1992**, *26*.
10. Winn, M. D.; Ballard, C. C.; Cowtan, K. D.; Dodson, E. J.; Emsley, P.; Evans, P. R.; Keegan, R. M.; Krissinel, E. B.; Leslie, A. G.; McCoy, A.; McNicholas, S. J.; Murshudov, G. N.; Pannu, N. S.; Potterton, E. A.; Powell, H. R.; Read, R. J.; Vagin, A.; Wilson, K. S., Overview of the CCP4 suite and current developments. *Acta Crystallogr., Sect. D: Biol. Crystallogr.* **2011**, *67* (Pt 4), 235-42.
11. McCoy, A. J.; Grosse-Kunstleve, R. W.; Adams, P. D.; Winn, M. D.; Storoni, L. C.; Read, R. J., Phaser crystallographic software. *J. Appl. Crystallogr.* **2007**, *40* (Pt 4), 658-674.

12. (a) Murshudov, G. N.; Vagin, A. A.; Dodson, E. J., Refinement of macromolecular structures by the maximum-likelihood method. *Acta Crystallogr., Sect. D: Biol. Crystallogr.* **1997**, *53* (Pt 3), 240-55; (b) Murshudov, G. N.; Skubak, P.; Lebedev, A. A.; Pannu, N. S.; Steiner, R. A.; Nicholls, R. A.; Winn, M. D.; Long, F.; Vagin, A. A., REFMAC5 for the refinement of macromolecular crystal structures. *Acta Crystallogr., Sect. D: Biol. Crystallogr.* **2011**, *67* (Pt 4), 355-67; (c) Vagin, A. A.; Steiner, R. A.; Lebedev, A. A.; Potterton, L.; McNicholas, S.; Long, F.; Murshudov, G. N., REFMAC5 dictionary: organization of prior chemical knowledge and guidelines for its use. *Acta Crystallogr., Sect. D: Biol. Crystallogr.* **2004**, *60* (Pt 12 Pt 1), 2184-95.
13. Emsley, P.; Cowtan, K., Coot: model-building tools for molecular graphics. *Acta Crystallogr., Sect. D: Biol. Crystallogr.* **2004**, *60* (Pt 12 Pt 1), 2126-32.
